# Supplementary material for: Changes in peripheral blood lymphocyte subtypes after transjugular intrahepatic portosystemic shunt in patients with decompensated liver cirrhosis: a prospective cohort study
Source: Research Square preprint supplement (doi:10.21203/rs.3.rs-6622669/v1), 2025-06-04
Supplement: Supplementary file 1 [file 202d4580cfb36299f5ea001e.docx]

**Supplementary Table 2. Subtypes of lymphocytes in the peripheral blood of patients after TIPS.**

| Characteristic | Patients (N = 68) |
| --- | --- |
| CD3+ (%, IQR) | 71 (61, 77) |
| CD3+CD4+ (%, mean ± SD) | 41.9 ± 10.7 |
| CD3+CD8+ (%, mean ± SD) | 24 (16, 28) |
| CD19+ (%, IQR) | 14 (11, 20) |
| CD56+ (%, IQR) | 11 (7, 20) |
| Treg (%, mean ± SD) | 5 ± 1.3 |
| CD3+ (cells/μl, IQR) | 286 (208, 589) |
| CD3+CD4+ (cells/μl, IQR) | 196 (125, 372) |
| CD3+CD8+ (cells/μl, IQR) | 96 (56, 203) |
| CD19+ (cells/μl, IQR) | 62 (35, 116) |
| CD56+ (cells/μl, IQR) | 55 (27, 82) |
| CD4+/CD8+ (IQR) | 1.9 (1.3, 2.8) |

TIPS, transjugular intrahepatic portosystemic shunt; SD, standard deviation; IQR, interquartile range.
