# Supplementary material for: Changes in peripheral blood lymphocyte subtypes after transjugular intrahepatic portosystemic shunt in patients with decompensated liver cirrhosis: a prospective cohort study
Source: Research Square preprint supplement (doi:10.21203/rs.3.rs-6622669/v1), 2025-06-04
Supplement: Supplementary file 2 [file 48028fac67ad29a5297367ec.docx]

**Supplementary Table 3. Subgroup analysis of absolute counts of lymphocytes.**

| Subgroups | Number of patients | CD3+  (cells/μl) | CD19+  (cells/μl) |
| --- | --- | --- | --- |
| Male | 33 | ↓↓ | ↓↓↓↓ |
| Female | 14 | - | - |
| Young | 24 | ↓ | ↓↓ |
| Old | 23 | - | ↓↓↓↓ |
| Viral | 28 | - | ↓↓↓ |
| Non-viral | 19 | - | ↓↓ |
| No to mild ascites | 33 | ↓ | ↓↓↓ |
| Moderate to severe ascites | 14 | - | ↓↓↓ |
| Non-PVT | 21 | - | ↓↓↓↓ |
| PVT | 26 | ↓ | ↓ |
| Diameter-7 | 30 | ↓ | ↓↓↓↓ |
| Diameter-8 | 16 | - | ↓ |
| MELD ≤ 9 | 23 | - | ↓↓↓↓ |
| MELD > 9 | 24 | ↓ | ↓↓ |
| MELD-Na ≤ 15 | 39 | ↓ | ↓↓↓↓ |
| MELD-Na > 15 | 8 | - | - |
| Child-Pugh A | 13 | - | ↓ |
| Child-Pugh B | 28 | - | ↓↓↓ |
| Child-Pugh C | 6 | - | ↓ |

PVT, portal vein thrombosis; MELD, model for end-stage liver disease.

“↑” means a significant increase (p < 0.05); “↓” means a significant decrease (p < 0.05); The more of them means the more significant. “-” means no statistical difference.
