# Supplementary material for: Changes in peripheral blood lymphocyte subtypes after transjugular intrahepatic portosystemic shunt in patients with decompensated liver cirrhosis: a prospective cohort study
Source: Research Square preprint supplement (doi:10.21203/rs.3.rs-6622669/v1), 2025-06-04
Supplement: Supplementary file 3 [file 4a8215de8ee1b7f69adae639.docx]

**Supplementary Table 4. Subgroup analysis of the percentage of lymphocytes.**

| Subgroups | Number of patients | CD3+  (%) | CD3+CD4+  (%) | CD3+CD8+  (%) | CD19+  (%) |
| --- | --- | --- | --- | --- | --- |
| Male | 47 | ↑↑↑ | - | ↑↑ | ↓↓↓↓ |
| Female | 21 | - | - | - | ↓↓ |
| Young | 35 | ↑↑ | - | - | ↓↓↓↓ |
| Old | 33 | ↑↑ | - | ↑↑ | ↓↓↓↓ |
| Viral | 41 | ↑↑↑ | ↑ | ↑ | ↓↓↓↓ |
| Non-viral | 27 | - | - | ↑ | ↓↓↓ |
| No to mild ascites | 50 | ↑↑↑ | ↑ | ↑↑ | ↓↓↓↓ |
| Moderate to severe ascites | 18 | - | - | - | ↓↓↓↓ |
| Non-PVT | 33 | ↑↑↑↑ | ↑↑↑ | ↑↑ | ↓↓↓↓ |
| PVT | 35 | - | - | - | ↓↓↓ |
| Diameter-7 | 44 | ↑↑↑ | ↑ | ↑↑ | ↓↓↓↓ |
| Diameter-8 | 22 | - | - | - | ↓↓ |
| MELD ≤ 9 | 35 | ↑↑↑↑ | ↑↑ | ↑↑ | ↓↓↓↓ |
| MELD > 9 | 33 | - | - | - | ↓↓↓↓ |
| MELD-Na ≤ 15 | 58 | ↑↑ | - | ↑↑ | ↓↓↓↓ |
| MELD-Na > 15 | 10 | ↑↑ | ↑↑ | ↑↑ | ↓↓ |
| Child-Pugh A | 18 | - | - | - | ↓↓ |
| Child-Pugh B | 42 | ↑↑↑↑ | ↑↑ | ↑↑ | ↓↓↓↓ |
| Child-Pugh C | 8 | - | - | - | ↓ |

PVT, portal vein thrombosis; MELD, model for end-stage liver disease.

“↑” means a significant increase (p < 0.05); “↓” means a significant decrease (p < 0.05); The more of them means the more significant. “-” means no statistical difference.
