# Supplementary material for: Changes in peripheral blood lymphocyte subtypes after transjugular intrahepatic portosystemic shunt in patients with decompensated liver cirrhosis: a prospective cohort study
Source: Research Square preprint supplement (doi:10.21203/rs.3.rs-6622669/v1), 2025-06-04
Supplement: Supplementary file 4 [file a9120473a34796d772c042f8.docx]

**Supplementary Table 1.** **Subtypes of lymphocytes in the peripheral blood of patients before TIPS.**

| Characteristic | Patients (N = 68) |
| --- | --- |
| CD3+ (%, IQR) | 68 (55, 73) |
| CD3+CD4+ (%, mean ± SD) | 39.5 ± 10 |
| CD3+CD8+ (%, mean ± SD) | 21.4 ± 8.4 |
| CD19+ (%, IQR) | 20 (12 ,25) |
| CD56+ (%, IQR) | 11 (7, 17) |
| Treg (%, mean ± SD) | 5.1 ± 1.6 |
| CD3+ (cells/μl, IQR) | 321 (216, 690) |
| CD3+CD4+ (cells/μl, IQR) | 193 (136, 406) |
| CD3+CD8+ (cells/μl, IQR) | 104 (51, 207) |
| CD19+ (cells/μl, IQR) | 107 (56, 183) |
| CD56+ (cells/μl, IQR) | 51 (32, 115) |
| CD4+/CD8+ (IQR) | 1.9 (1.4, 2.9) |

TIPS, transjugular intrahepatic portosystemic shunt; SD, standard deviation; IQR, interquartile range.
